# Supplementary material
Source: MDPI journal article supplement (https://www.mdpi.com/2673-3293/4/4/28)
Supplement: s1 [file s1]

Archive with 1 entries (1 files):
- electrochem-2518117-supplementary.pdf
