# Supplementary material
Source: MDPI journal article supplement (https://www.mdpi.com/2673-3293/4/4/28)
Supplement: s1 [file s1 › electrochem-2518117-supplementary.pdf]

**Molecularly imprinted electrochemical sensor based on o-Phenylenediamine monomer for sensitive detection of oxycodone in water.**

Pranaya Charkravarthula<sup>1</sup> and Amos Mugweru<sup>1</sup>

<sup>1</sup>Department of Biochemistry and Chemistry, Rowan University, 201 Mullica Hill Rd, Glassboro New Jersey, 08028 USA

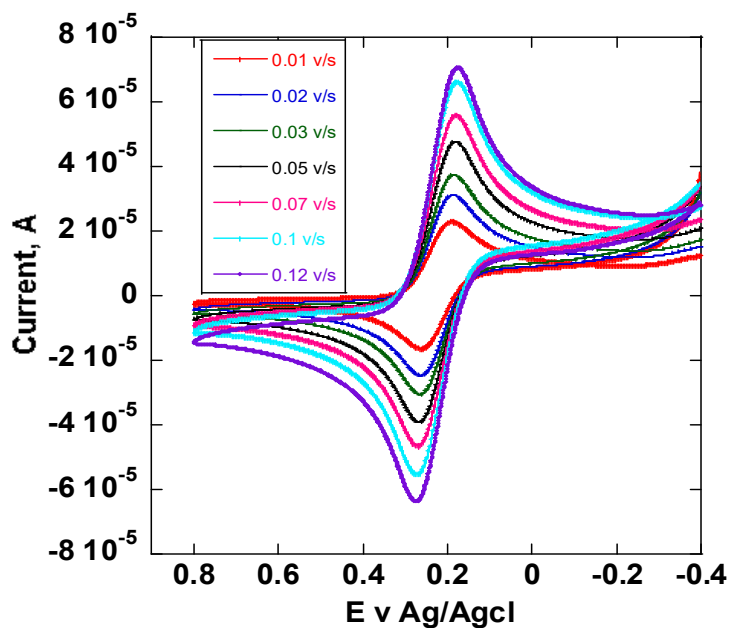

Figure S1: Cyclic voltammogram (CV) of an imprinted electrode at different scan rates in 0.5 mM  $[\text{Fe}(\text{CN})_6]^{3-/4-}$  in acetate buffer solution of pH 5.0. Cyclic voltammograms with increased scan rate

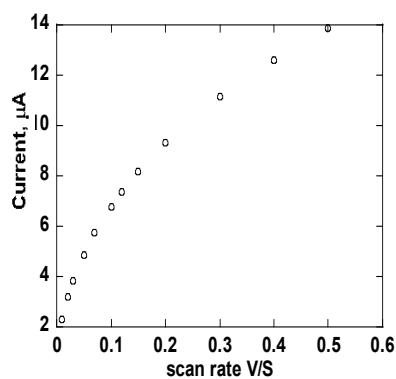

Figure S2: A plot of current versus scan rate of an imprinted electrode at different scan rates in 0.5 mM  $[\text{Fe}(\text{CN})_6]^{3-/4-}$  in acetate buffer solution of pH 5.0.

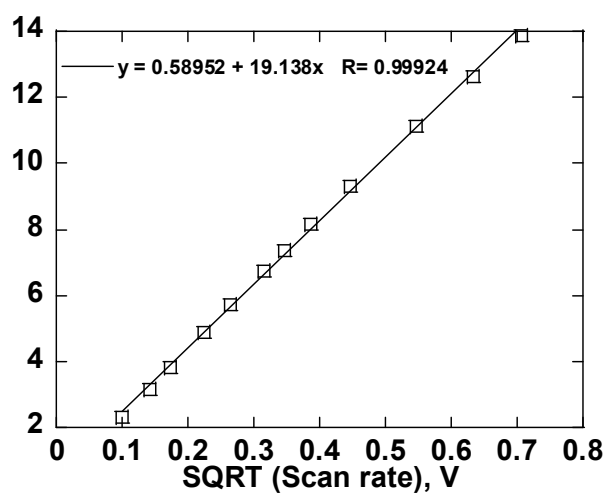

Figure. S3: A plot of current versus square root scan of an imprinted electrode at different scan rates in 0.5 mM  $[\text{Fe}(\text{CN})_6]^{3-/4-}$  in acetate buffer solution of pH 5.0.
